# Supplementary material
Source: HighWire-hosted journal article supplement (https://jnm.snmjournals.org/highwire/filestream/99802/field_highwire_adjunct_files/0/244897_Supplemental_Data.pdf)
Supplement: 244897_Supplemental_Data.pdf [file 244897_Supplemental_Data.pdf]

**Supplemental Table 1.** HGF in the tumor and plasma of NSG mice bearing subcutaneous PDX RCC as determined by an ELISA assay.

| HGF (pg/ml) |            |            |
|-------------|------------|------------|
|             | Tumor      | Plasma     |
| 24h         | 626.5±42.2 | 417.7±18.8 |
| 48h         | 588.8±26.4 | 404.7±1.89 |
| 72h         | 645.3±69.3 | 446.2±9.66 |

**Supplemental Table 2.** Biodistribution at 120 h p.i. of [<sup>89</sup>Zr]Zr-DFO-onartuzumab in NSG mice bearing subcutaneous PDX RCC and treated with saline (control), cetuximab or a combination of INC280 and trametinib (labeled as INC280/ trametinib). Cetuximab was intravenously administered (50 mg/kg of mice) twice a week for 10 days. INC280 (10 mg/kg of mice) and trametinib (1.5 mg/kg of mice) were orally administered daily for 10 days. [<sup>89</sup>Zr]Zr-DFO-onartuzumab (2.7 MBq, 15µg) was administered by tail vein injection on day 10 (*see Fig. SI 4*). Biodistribution studies were performed at 120 h p.i. of [<sup>89</sup>Zr]Zr-DFO-onartuzumab.

|                        | Control (%ID/g) |      |   | INC280/Trametinib (%ID/g) |      |   | Cetuximab (%ID/g) |      |   |
|------------------------|-----------------|------|---|---------------------------|------|---|-------------------|------|---|
|                        | Mean            | S.D. | N | Mean                      | S.D. | N | Mean              | S.D. | N |
| <b>Blood</b>           | 7.44            | 0.68 | 4 | 8.10                      | 1.03 | 4 | 6.83              | 1.27 | 4 |
| <b>Heart</b>           | 3.00            | 0.56 | 4 | 3.32                      | 0.64 | 4 | 2.77              | 0.56 | 4 |
| <b>Liver</b>           | 3.34            | 0.49 | 4 | 2.57                      | 0.26 | 4 | 3.36              | 0.97 | 4 |
| <b>Lungs</b>           | 5.54            | 0.69 | 4 | 6.03                      | 1.79 | 4 | 5.22              | 2.12 | 4 |
| <b>Stomach</b>         | 1.12            | 0.29 | 4 | 0.92                      | 0.13 | 4 | 0.80              | 0.38 | 4 |
| <b>Spleen</b>          | 3.82            | 0.92 | 4 | 4.03                      | 2.28 | 4 | 3.84              | 1.72 | 4 |
| <b>Pancreas</b>        | 0.96            | 0.12 | 4 | 1.49                      | 0.59 | 4 | 0.90              | 0.21 | 4 |
| <b>Small Intestine</b> | 1.10            | 0.08 | 4 | 1.23                      | 0.10 | 4 | 1.17              | 0.31 | 4 |
| <b>Large Intestine</b> | 1.30            | 0.14 | 4 | 0.99                      | 0.21 | 4 | 1.09              | 0.42 | 4 |
| <b>Kidneys</b>         | 6.59            | 0.33 | 4 | 6.59                      | 1.51 | 4 | 5.01              | 0.39 | 4 |
| <b>Skin</b>            | 3.31            | 0.23 | 4 | 3.58                      | 0.04 | 4 | 3.26              | 0.70 | 4 |
| <b>Muscle</b>          | 0.78            | 0.16 | 4 | 1.03                      | 0.23 | 4 | 0.85              | 0.84 | 4 |
| <b>Bone</b>            | 2.88            | 0.65 | 4 | 3.93                      | 0.41 | 4 | 6.37              | 1.56 | 4 |
| <b>Tail</b>            | 2.03            | 0.80 | 4 | 2.44                      | 1.44 | 4 | 1.94              | 0.40 | 4 |
| <b>Tumor</b>           | 43.5            | 9.12 | 4 | 31.9                      | 8.95 | 4 | 50.9              | 12.0 | 4 |

**Supplemental Table 3.** Biodistribution at 120 h p.i. of [ <sup>89</sup>Zr]Zr-DFO-panitumumab in NSG mice bearing subcutaneous PDX RCC and treated with saline (control), cetuximab or a combination of INC280 and trametinib (labeled as INC280/ trametinib). Cetuximab was intravenously administered (50 mg/kg of mice) twice a week for 10 days. INC280 (10 mg/kg of mice) and trametinib (1.5 mg/kg of mice) were orally administered daily for 10 days. [ <sup>89</sup>Zr]Zr-DFO-panitumumab (11.0 MBq, 50 µg protein) was administered by tail vein injection on day 10 (*see Fig. SI 4*). Biodistribution studies were performed at 120 h p.i. of [ <sup>89</sup>Zr]Zr-DFO-panitumumab.

|                        | Control (%ID/g) |      |   | INC280/Trametinib (%ID/g) |      |   | Cetuximab (%ID/g) |      |   |
|------------------------|-----------------|------|---|---------------------------|------|---|-------------------|------|---|
|                        | Mean            | S.D. | N | Mean                      | S.D. | N | Mean              | S.D. | N |
| <b>Blood</b>           | 8.05            | 3.69 | 4 | 13.5                      | 1.54 | 4 | 14.5              | 1.98 | 4 |
| <b>Heart</b>           | 3.63            | 3.05 | 4 | 3.56                      | 0.90 | 4 | 3.38              | 1.21 | 4 |
| <b>Liver</b>           | 5.76            | 1.03 | 4 | 4.52                      | 0.70 | 4 | 6.33              | 0.93 | 4 |
| <b>Lungs</b>           | 2.65            | 1.72 | 4 | 6.77                      | 0.91 | 4 | 6.70              | 1.26 | 4 |
| <b>Stomach</b>         | 0.91            | 0.37 | 4 | 0.82                      | 0.16 | 4 | 1.00              | 0.07 | 4 |
| <b>Spleen</b>          | 9.64            | 1.02 | 4 | 6.31                      | 1.54 | 4 | 7.38              | 1.42 | 4 |
| <b>Pancreas</b>        | 0.87            | 0.15 | 4 | 1.32                      | 0.32 | 4 | 0.92              | 0.51 | 4 |
| <b>Small Intestine</b> | 1.07            | 0.24 | 4 | 1.02                      | 0.15 | 4 | 2.41              | 1.98 | 4 |
| <b>Large Intestine</b> | 1.57            | 0.90 | 4 | 0.90                      | 0.10 | 4 | 1.32              | 0.46 | 4 |
| <b>Kidneys</b>         | 2.47            | 1.17 | 4 | 2.67                      | 0.41 | 4 | 4.13              | 0.43 | 4 |
| <b>Skin</b>            | 3.35            | 0.88 | 4 | 2.96                      | 0.31 | 4 | 2.34              | 1.26 | 4 |
| <b>Muscle</b>          | 0.44            | 0.21 | 4 | 0.75                      | 0.13 | 4 | 0.72              | 0.22 | 4 |
| <b>Bone</b>            | 4.49            | 1.82 | 4 | 2.91                      | 0.64 | 4 | 5.24              | 2.05 | 4 |
| <b>Tail</b>            | 1.30            | 0.19 | 4 | 2.83                      | 1.17 | 4 | 3.48              | 3.25 | 4 |
| <b>Tumor</b>           | 16.5            | 4.40 | 4 | 12.2                      | 1.28 | 4 | 24.3              | 5.58 | 4 |

**Supplemental Table 4.** Biodistribution at 120 h p.i. of [<sup>89</sup>Zr]Zr-DFO-trastuzumab in NSG mice bearing subcutaneous PDX RCC and treated with saline (control), cetuximab or a combination of INC280 and trametinib (labeled as INC280/ trametinib). Cetuximab was intravenously administered (50 mg/kg of mice) twice a week for 10 days. INC280 (10 mg/kg of mice) and trametinib (1.5 mg/kg of mice) were orally administered daily for 10 days. [<sup>89</sup>Zr]Zr-DFO-trastuzumab (8.14 MBq, 80 µg protein) was administered by tail vein injection on day 10 (*see Fig. SI 4*). Biodistribution studies were performed at 120 h p.i. of [<sup>89</sup>Zr]Zr-DFO-trastuzumab.

|                        | Control (%ID/g) |      |   | INC280/Trametinib (%ID/g) |      |   | Cetuximab (%ID/g) |      |   |
|------------------------|-----------------|------|---|---------------------------|------|---|-------------------|------|---|
|                        | Mean            | S.D. | N | Mean                      | S.D. | N | Mean              | S.D. | N |
| <b>Blood</b>           | 5.48            | 3.52 | 4 | 9.05                      | 6.85 | 4 | 2.88              | 0.40 | 4 |
| <b>Heart</b>           | 2.17            | 2.63 | 4 | 2.49                      | 0.50 | 4 | 1.20              | 0.06 | 4 |
| <b>Liver</b>           | 5.72            | 1.40 | 4 | 3.86                      | 0.12 | 4 | 4.97              | 0.41 | 4 |
| <b>Lungs</b>           | 3.13            | 3.09 | 4 | 3.90                      | 0.57 | 4 | 2.71              | 0.20 | 4 |
| <b>Stomach</b>         | 0.79            | 0.48 | 4 | 0.67                      | 0.06 | 4 | 0.81              | 0.07 | 4 |
| <b>Spleen</b>          | 13.9            | 4.44 | 4 | 7.78                      | 4.39 | 4 | 10.8              | 5.05 | 4 |
| <b>Pancreas</b>        | 0.91            | 0.75 | 4 | 0.90                      | 0.24 | 4 | 1.01              | 0.59 | 4 |
| <b>Small Intestine</b> | 2.01            | 0.75 | 4 | 1.83                      | 0.16 | 4 | 2.82              | 0.04 | 4 |
| <b>Large Intestine</b> | 1.04            | 0.17 | 4 | 0.76                      | 0.34 | 4 | 1.24              | 0.18 | 4 |
| <b>Kidneys</b>         | 2.41            | 1.06 | 4 | 1.79                      | 0.63 | 4 | 1.84              | 0.12 | 4 |
| <b>Skin</b>            | 3.96            | 1.45 | 4 | 2.47                      | 0.28 | 4 | 1.91              | 0.24 | 4 |
| <b>Muscle</b>          | 0.43            | 0.15 | 4 | 0.51                      | 0.22 | 4 | 0.35              | 0.12 | 4 |
| <b>Bone</b>            | 5.88            | 1.26 | 4 | 4.34                      | 1.29 | 4 | 5.81              | 1.35 | 4 |
| <b>Tail</b>            | 1.61            | 0.97 | 4 | 1.30                      | 0.20 | 4 | 2.81              | 2.28 | 4 |
| <b>Tumor</b>           | 16.33           | 0.32 | 4 | 8.53                      | 0.68 | 4 | 18.90             | 0.95 | 4 |

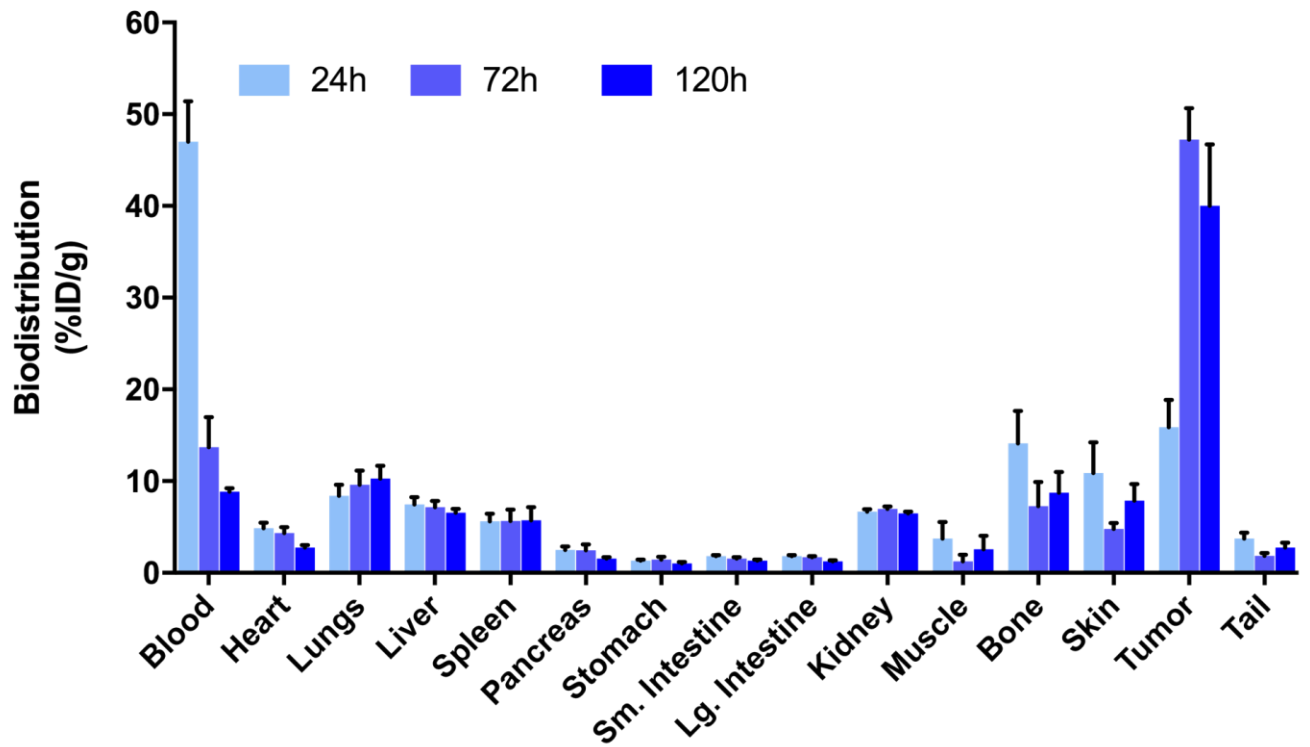

**Supplemental Figure 1.** Biodistribution at 24, 72, and 120 h p.i. of [<sup>89</sup>Zr]Zr-DFO-onartuzumab in NSG mice bearing subcutaneous PDX RCC. [<sup>89</sup>Zr]Zr-DFO-onartuzumab (2.7 MBq, 15μg) was administered by tail vein injection. %ID/g, percentage of injected dose per gram.

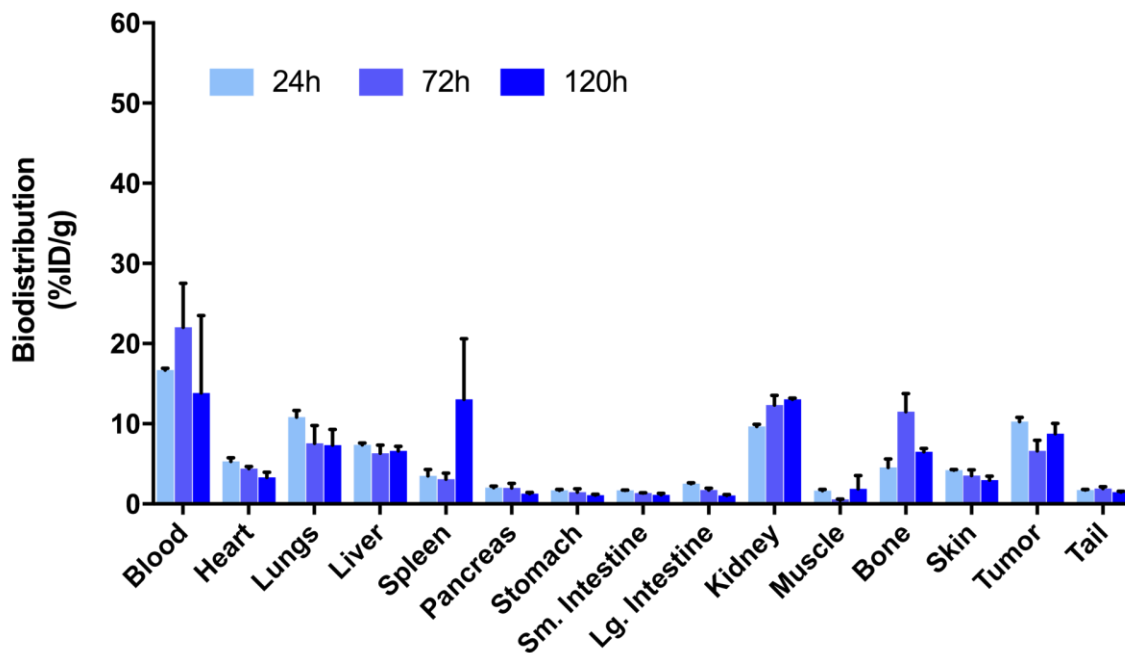

**Supplemental Figure 2.** Biodistribution at 24, 72, and 120 h p.i. of [<sup>89</sup>Zr]Zr-DFO-onartuzumab with unlabeled onartuzumab blocking in NSG mice bearing subcutaneous PDX RCC. [<sup>89</sup>Zr]Zr-DFO-onartuzumab (2.7 MBq, 15μg) was administered by tail vein injection. Blocking experiments were performed by administration of a 25-fold mass excess of unlabeled onartuzumab 48 h prior to injection of [<sup>89</sup>Zr]Zr-DFO-onartuzumab. %ID/g, percentage of injected dose per gram.



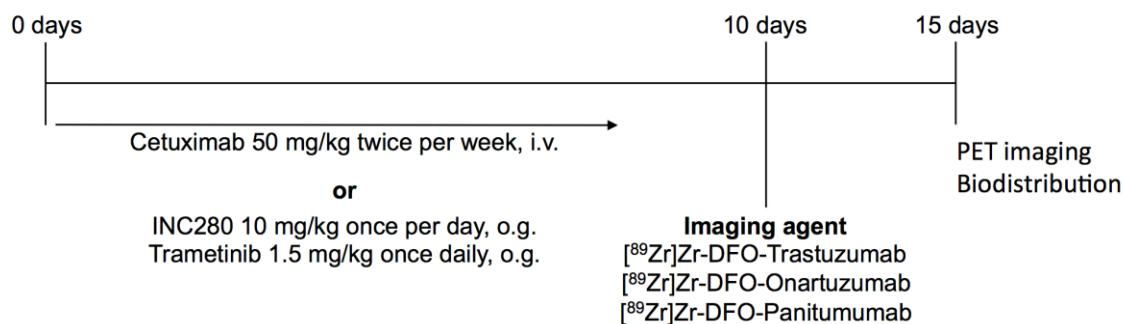

**Supplemental Figure 4.** Schematic diagram of PDX RCC bearing mice treated with saline (control), cetuximab or a combination of INC280 and trametinib (labeled as INC280/trametinib) and imaged with <sup>89</sup>Zr-labeled anti-HER2 (trastuzumab), <sup>89</sup>Zr-labeled anti-EGFR (panitumumab) or <sup>89</sup>Zr-labeled anti-MET (onartuzumab) antibodies. Cetuximab was intravenously administered (50 mg/kg of mice) twice a week for 10 days. INC280 (10 mg/kg of mice) and trametinib (1.5 mg/kg of mice) were orally administered daily for 10 days. [<sup>89</sup>Zr]Zr-DFO-onartuzumab (2.7 MBq, 15µg), [<sup>89</sup>Zr]Zr-DFO-panitumumab (11.0 MBq, 50 µg protein), and [<sup>89</sup>Zr]Zr-DFO-trastuzumab (8.14 MBq, 80 µg protein) were administered by tail vein injection on day 10. PET images, biodistribution, and Western blot analyses were performed at 120 h p.i. of <sup>89</sup>Zr-labeled antibodies.



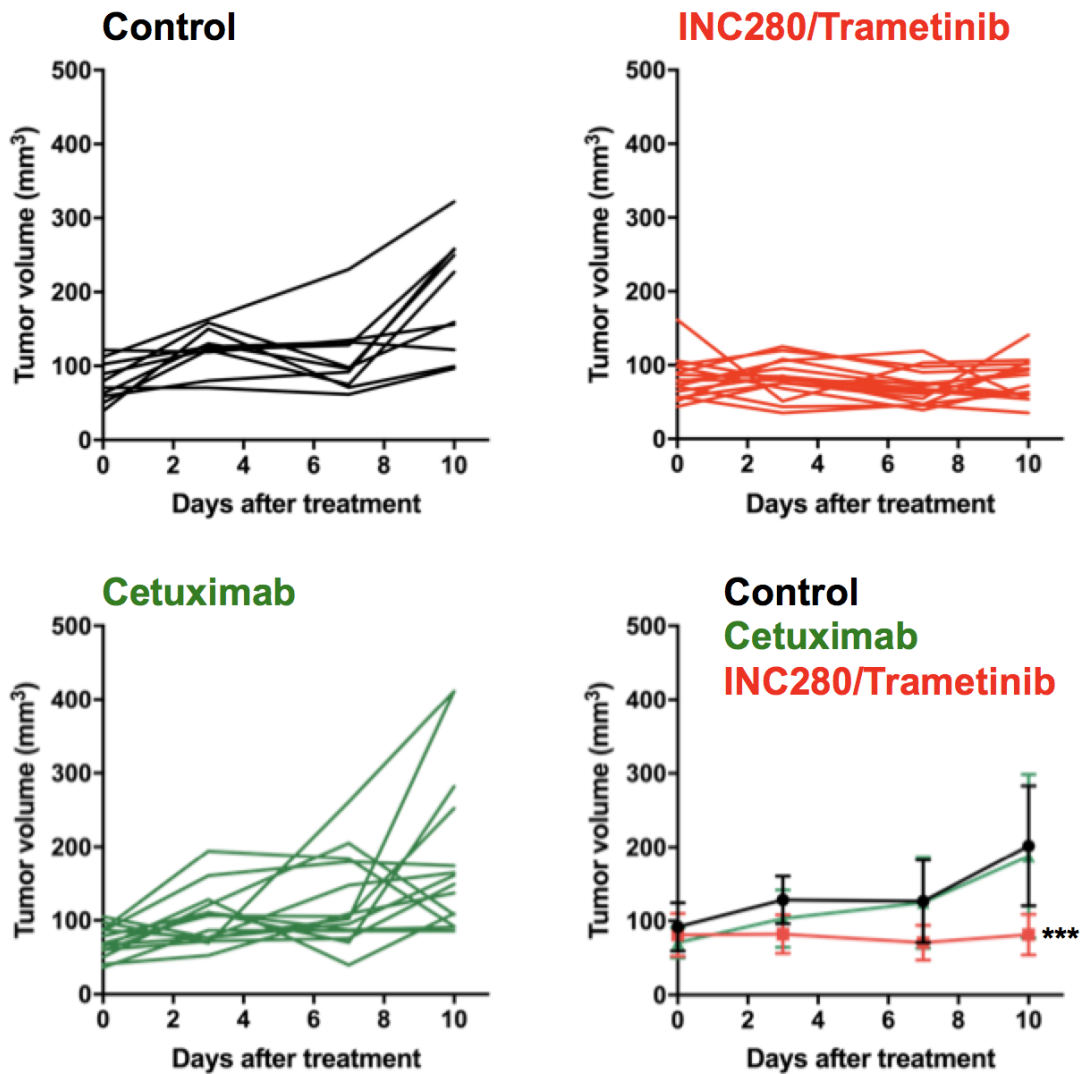

**Supplemental Figure 5.** Tumor volumes (mm<sup>3</sup>) as a function of time in control (saline), cetuximab, and a combination of INC280 and trametinib (labeled as INC280/ trametinib) treated NSG mice bearing subcutaneous PDX RCC tumors (n = 10 mice per group). Cetuximab was intravenously administered (50 mg/kg of mice) twice a week for 10 days. INC280 (10 mg/kg of mice) and trametinib (1.5 mg/kg of mice) were orally administered daily for 10 days. \*\*\* $P < 0.001$  based on a Student's  $t$ -test and compared with control or cetuximab at day 10.

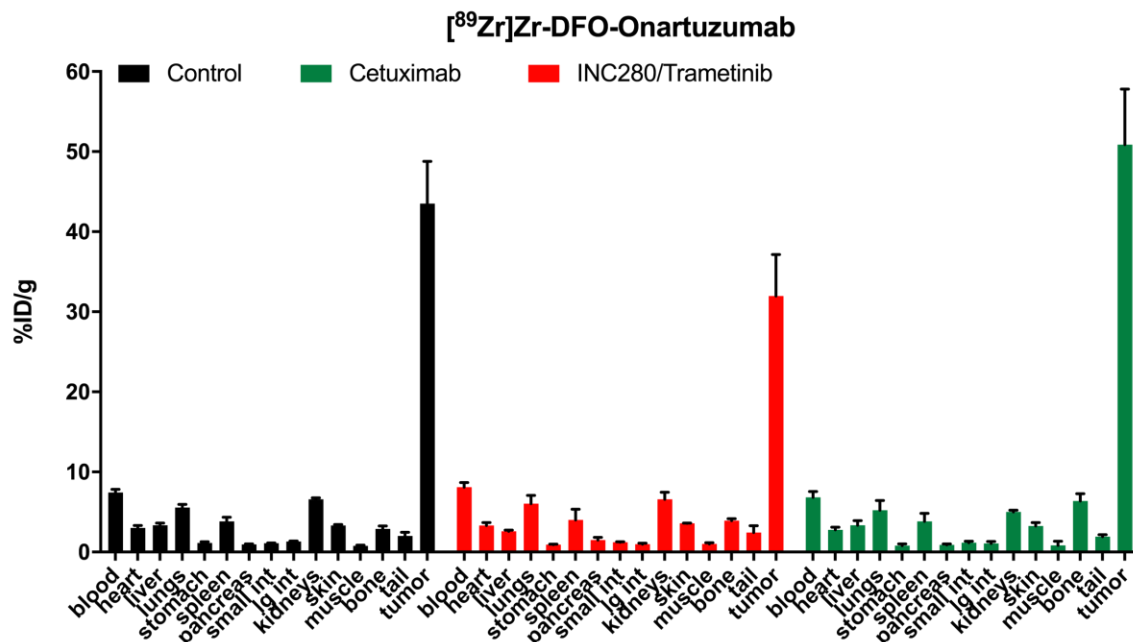

**Supplemental Figure 6.** Biodistribution at 120 h p.i. of [<sup>89</sup>Zr]Zr-DFO-onartuzumab in NSG mice bearing subcutaneous PDX RCC and treated with saline (control), cetuximab or a combination of INC280 and trametinib (labeled as INC280/ trametinib). Cetuximab was intravenously administered (50 mg/kg of mice) twice a week for 10 days. INC280 (10 mg/kg of mice) and trametinib (1.5 mg/kg of mice) were orally administered daily for 10 days. [<sup>89</sup>Zr]Zr-DFO-onartuzumab (2.7 MBq, 15µg) was administered by tail vein injection on day 10 (*see Fig. SI 4*). Biodistribution studies were performed at 120 h p.i. of [<sup>89</sup>Zr]Zr-DFO-onartuzumab.

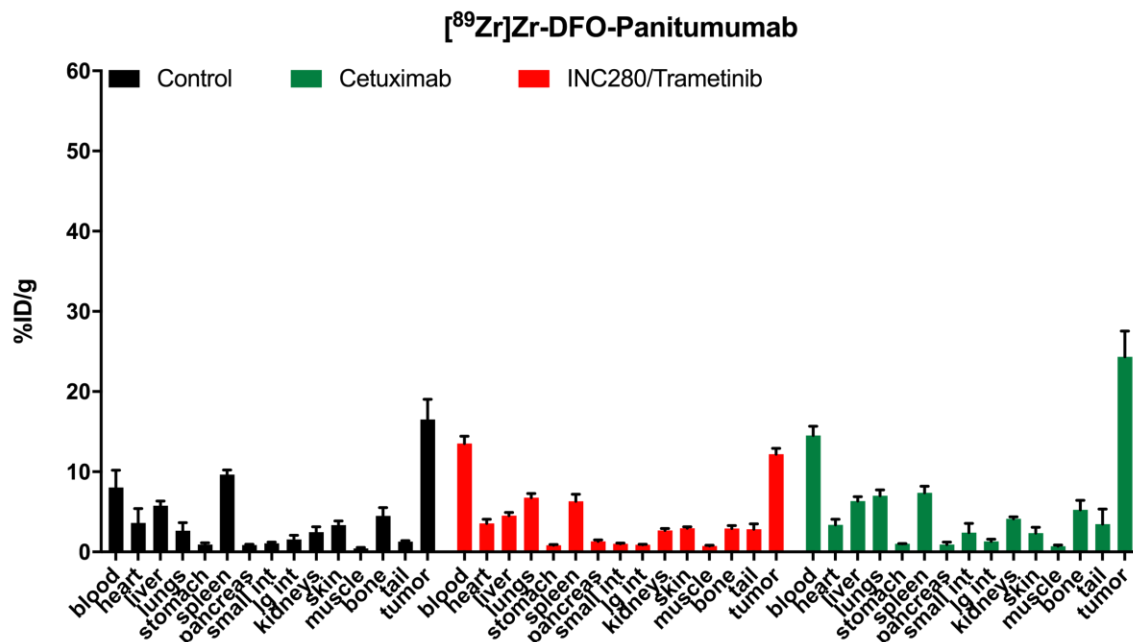

**Supplemental Figure 7.** Biodistribution at 120 h p.i. of [<sup>89</sup>Zr]Zr-DFO-panitumumab in NSG mice bearing subcutaneous PDX RCC and treated with saline (control), cetuximab or a combination of INC280 and trametinib (labeled as INC280/ trametinib). Cetuximab was intravenously administered (50 mg/kg of mice) twice a week for 10 days. INC280 (10 mg/kg of mice) and trametinib (1.5 mg/kg of mice) were orally administered daily for 10 days. [<sup>89</sup>Zr]Zr-DFO-panitumumab (11.0 MBq, 50 µg protein) was administered by tail vein injection on day 10 (*see Fig. SI 4*). Biodistribution studies were performed at 120 h p.i. of [<sup>89</sup>Zr]Zr-DFO-panitumumab.

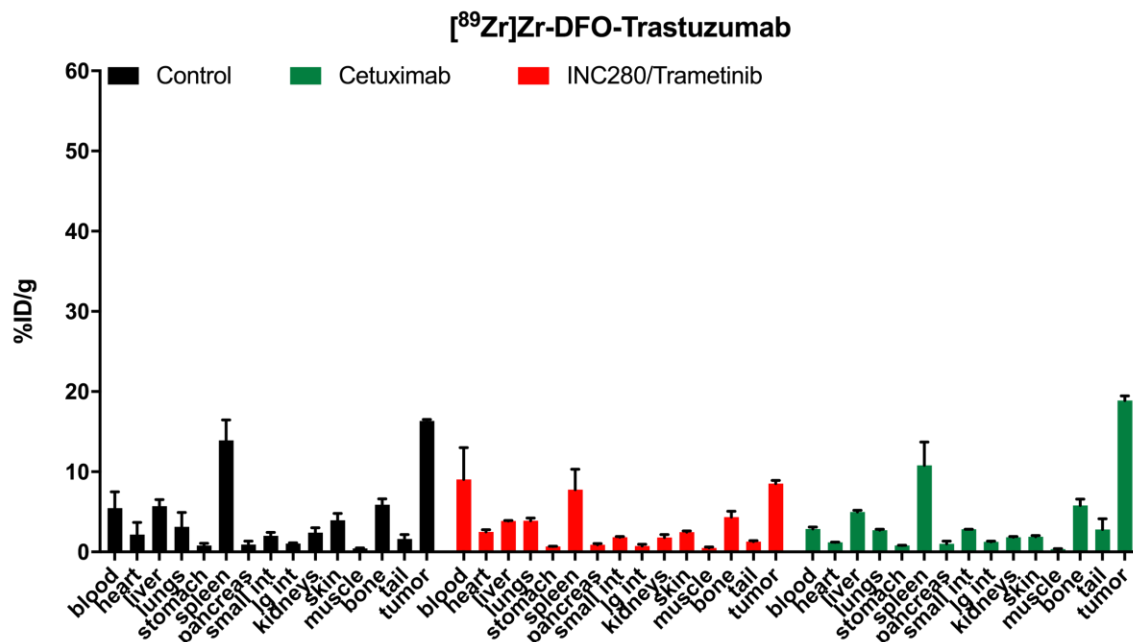

**Supplemental Figure 8.** Biodistribution at 120 h p.i. of [<sup>89</sup>Zr]Zr-DFO-trastuzumab in NSG mice bearing subcutaneous PDX RCC and treated with saline (control), cetuximab or a combination of INC280 and trametinib (labeled as INC280/ trametinib). Cetuximab was intravenously administered (50 mg/kg of mice) twice a week for 10 days. INC280 (10 mg/kg of mice) and trametinib (1.5 mg/kg of mice) were orally administered daily for 10 days. [<sup>89</sup>Zr]Zr-DFO-trastuzumab (8.14 MBq, 80 µg protein) was administered by tail vein injection on day 10 (see Fig. *SI 4*). Biodistribution studies were performed at 120 h p.i. of [<sup>89</sup>Zr]Zr-DFO-trastuzumab.
